# Supplementary material for: Sickness absence as a predictor of disability retirement in different occupational classes: a register-based study of a working-age cohort in Finland in 2007–2014
Source: PubMed Central journal article supplement — BMJ Open. 2018 May 9;8(5):e020491. doi: 10.1136/bmjopen-2017-020491 (PMC5942421; doi:10.1136/bmjopen-2017-020491), 2018-05-09
Supplement: bmjopen-2017-020491supp001.pdf [file bmjopen-2017-020491supp001.pdf]

**Appendix table 1.** Hazard ratios with 95% confidence intervals for the risk of disability retirement according to the length and diagnosis of sickness absence in different occupational classes in men.

|                                         | Length of sickness absence |      |           |       |           |        |            |          |            |         | Interaction p-value from the Wald test <sup>1</sup> |
|-----------------------------------------|----------------------------|------|-----------|-------|-----------|--------|------------|----------|------------|---------|-----------------------------------------------------|
|                                         | 0                          | 1-30 |           | 31-60 |           | 61-180 |            | over 180 |            |         |                                                     |
|                                         | HR                         | HR   | CI        | HR    | CI        | HR     | CI         | HR       | CI         |         |                                                     |
| <i>All diagnoses</i>                    |                            |      |           |       |           |        |            |          |            |         |                                                     |
| Upper non-manual                        | 1                          | 2.61 | 2.31-2.95 | 3.43  | 2.98-3.93 | 6.35   | 5.60-7.21  | 9.19     | 7.40-11.40 |         |                                                     |
| Lower non-manual                        | 1                          | 2.16 | 1.97-2.37 | 2.96  | 2.66-3.29 | 3.97   | 3.59-4.39  | 6.02     | 5.16-7.02  | p<0.001 |                                                     |
| Manual worker                           | 1                          | 1.84 | 1.76-1.93 | 2.40  | 2.29-2.53 | 3.03   | 2.89-3.18  | 3.51     | 3.23-3.81  | p<0.001 |                                                     |
| Self-employed                           | 1                          | 2.12 | 1.90-2.37 | 2.64  | 2.36-2.96 | 3.63   | 3.29-4.00  | 5.19     | 4.49-6.01  | p<0.001 |                                                     |
| Outside employment                      | 1                          | 1.49 | 1.37-1.63 | 1.82  | 1.67-1.99 | 2.41   | 2.25-2.59  | 3.35     | 3.12-3.59  | p<0.001 |                                                     |
| <i>Musculoskeletal diseases</i>         |                            |      |           |       |           |        |            |          |            |         |                                                     |
| Upper non-manual                        | 1                          | 2.73 | 2.17-3.44 | 3.47  | 2.68-4.50 | 4.94   | 3.87-6.32  | 7.28     | 4.22-12.55 |         |                                                     |
| Lower non-manual                        | 1                          | 2.75 | 2.40-3.14 | 2.95  | 2.50-3.49 | 3.51   | 2.96-4.17  | 6.02     | 4.70-7.70  | p<0.001 |                                                     |
| Manual worker                           | 1                          | 2.03 | 1.92-2.15 | 2.67  | 2.49-2.86 | 2.87   | 2.68-3.08  | 3.23     | 2.88-3.63  | p<0.001 |                                                     |
| Self-employed                           | 1                          | 2.49 | 2.10-2.96 | 2.91  | 2.42-3.50 | 3.94   | 3.38-4.58  | 5.58     | 4.45-7.00  | p<0.001 |                                                     |
| Outside employment                      | 1                          | 1.55 | 1.33-1.80 | 1.71  | 1.44-2.02 | 2.18   | 1.89-2.52  | 2.73     | 2.39-3.13  | p<0.001 |                                                     |
| <i>Mental and behavioural disorders</i> |                            |      |           |       |           |        |            |          |            |         |                                                     |
| Upper non-manual                        | 1                          | 4.02 | 3.16-5.11 | 4.48  | 3.38-5.92 | 8.80   | 6.99-11.09 | 9.74     | 7.10-13.37 |         |                                                     |
| Lower non-manual                        | 1                          | 2.73 | 2.20-3.37 | 4.32  | 3.47-5.37 | 5.03   | 4.06-6.24  | 6.55     | 4.90-8.76  | p<0.001 |                                                     |
| Manual worker                           | 1                          | 2.04 | 1.78-2.32 | 2.97  | 2.57-3.44 | 3.69   | 3.17-4.29  | 3.15     | 2.44-4.06  | p<0.001 |                                                     |
| Self-employed                           | 1                          | 3.25 | 2.27-4.65 | 3.48  | 2.52-4.81 | 5.16   | 4.04-6.58  | 5.19     | 3.60-7.48  | p<0.001 |                                                     |
| Outside employment                      | 1                          | 1.65 | 1.38-1.97 | 2.28  | 1.94-2.69 | 3.14   | 2.77-3.57  | 3.49     | 3.11-3.92  | p<0.001 |                                                     |
| <i>Other diagnoses</i>                  |                            |      |           |       |           |        |            |          |            |         |                                                     |
| Upper non-manual                        | 1                          | 2.19 | 1.89-2.54 | 2.69  | 2.23-3.25 | 5.05   | 4.21-6.06  | 6.89     | 4.78-9.93  |         |                                                     |
| Lower non-manual                        | 1                          | 1.85 | 1.64-2.08 | 2.21  | 1.90-2.57 | 3.00   | 2.58-3.50  | 4.34     | 3.34-5.63  | p<0.001 |                                                     |
| Manual worker                           | 1                          | 1.63 | 1.54-1.73 | 1.99  | 1.86-2.14 | 2.38   | 2.21-2.57  | 3.11     | 2.73-3.54  | p<0.001 |                                                     |
| Self-employed                           | 1                          | 1.96 | 1.71-2.23 | 2.26  | 1.96-2.61 | 2.76   | 2.39-3.18  | 4.02     | 3.19-5.06  | p<0.001 |                                                     |
| Outside employment                      | 1                          | 1.49 | 1.34-1.66 | 1.62  | 1.44-1.82 | 2.01   | 1.81-2.22  | 3.13     | 2.80-3.49  | p<0.001 |                                                     |

Adjusted for socio-demographic variables. <sup>1</sup> Wald test for the interaction term between occupational class and length of sickness absence on disability retirement.

**Appendix table 2.** Hazard ratios with 95% confidence intervals for the risk of disability retirement according to the length and diagnosis of sickness absence in different occupational classes in women.

|                                         | Length of sickness absence |      |           |      |           |      |           |      |           |         | Interaction p-value from the Wald test <sup>1</sup> |
|-----------------------------------------|----------------------------|------|-----------|------|-----------|------|-----------|------|-----------|---------|-----------------------------------------------------|
|                                         | 0                          |      | 1-30      |      | 31-60     |      | 61-180    |      | over 180  |         |                                                     |
|                                         | HR                         | HR   | CI        | HR   | CI        | HR   | CI        | HR   | CI        |         |                                                     |
| <i>All diagnoses</i>                    |                            |      |           |      |           |      |           |      |           |         |                                                     |
| Upper non-manual                        | 1                          | 2.36 | 2.15-2.60 | 2.93 | 2.62-3.26 | 4.93 | 4.42-5.49 | 7.26 | 6.16-8.57 |         |                                                     |
| Lower non-manual                        | 1                          | 2.27 | 2.18-2.37 | 2.76 | 2.64-2.90 | 4.04 | 3.85-4.23 | 6.13 | 5.69-6.60 | p<0.001 |                                                     |
| Manual worker                           | 1                          | 1.90 | 1.80-1.99 | 2.28 | 2.15-2.41 | 3.22 | 3.05-3.40 | 3.94 | 3.61-4.29 | p<0.001 |                                                     |
| Self-employed                           | 1                          | 2.36 | 2.09-2.67 | 2.73 | 2.40-3.10 | 3.61 | 3.20-4.07 | 5.20 | 4.41-6.32 | p<0.001 |                                                     |
| Outside employment                      | 1                          | 1.60 | 1.48-1.74 | 1.89 | 1.74-2.06 | 2.57 | 2.39-2.76 | 3.84 | 3.58-4.12 | p<0.001 |                                                     |
| <i>Musculoskeletal diseases</i>         |                            |      |           |      |           |      |           |      |           |         |                                                     |
| Upper non-manual                        | 1                          | 2.56 | 2.15-3.05 | 3.15 | 2.60-3.81 | 4.05 | 3.33-4.93 | 5.92 | 4.14-8.49 |         |                                                     |
| Lower non-manual                        | 1                          | 2.74 | 2.59-2.90 | 3.03 | 2.82-3.26 | 3.65 | 3.40-3.91 | 5.40 | 4.80-6.06 | p<0.001 |                                                     |
| Manual worker                           | 1                          | 1.99 | 1.87-2.12 | 2.54 | 2.36-2.74 | 3.00 | 2.79-3.24 | 3.70 | 3.28-4.16 | p<0.001 |                                                     |
| Self-employed                           | 1                          | 3.04 | 2.56-3.60 | 2.85 | 2.29-3.54 | 3.83 | 3.21-4.57 | 5.18 | 3.96-6.78 | p<0.001 |                                                     |
| Outside employment                      | 1                          | 1.57 | 1.37-1.79 | 1.99 | 1.71-2.30 | 2.30 | 2.02-2.62 | 3.11 | 2.75-3.52 | p<0.001 |                                                     |
| <i>Mental and behavioural disorders</i> |                            |      |           |      |           |      |           |      |           |         |                                                     |
| Upper non-manual                        | 1                          | 2.34 | 1.95-2.80 | 3.95 | 3.26-4.78 | 5.33 | 4.41-6.44 | 7.54 | 5.88-9.67 |         |                                                     |
| Lower non-manual                        | 1                          | 2.23 | 2.06-2.42 | 2.78 | 2.53-3.06 | 4.03 | 3.66-4.45 | 5.47 | 4.72-6.33 | p<0.001 |                                                     |
| Manual worker                           | 1                          | 1.88 | 1.69-2.10 | 2.23 | 1.94-2.57 | 3.28 | 2.85-3.78 | 3.43 | 2.76-4.25 | p<0.001 |                                                     |
| Self-employed                           | 1                          | 2.9  | 2.10-3.99 | 3.54 | 2.65-4.74 | 3.78 | 2.79-5.13 | 4.24 | 2.63-6.84 | p<0.001 |                                                     |
| Outside employment                      | 1                          | 1.55 | 1.33-1.81 | 2.03 | 1.74-2.36 | 2.93 | 2.61-3.29 | 3.94 | 3.53-4.39 | p<0.001 |                                                     |
| <i>Other diagnoses</i>                  |                            |      |           |      |           |      |           |      |           |         |                                                     |
| Upper non-manual                        | 1                          | 2.24 | 2.00-2.50 | 2.07 | 1.78-2.42 | 3.68 | 3.09-4.39 | 5.56 | 4.22-7.31 |         |                                                     |
| Lower non-manual                        | 1                          | 1.81 | 1.72-1.91 | 2.08 | 1.95-2.22 | 2.86 | 2.64-3.09 | 4.59 | 4.04-5.22 | p<0.001 |                                                     |
| Manual worker                           | 1                          | 1.63 | 1.53-1.74 | 1.79 | 1.65-1.93 | 2.42 | 2.22-2.64 | 2.88 | 2.45-3.37 | p<0.001 |                                                     |
| Self-employed                           | 1                          | 2.11 | 1.83-2.45 | 2.12 | 1.79-2.50 | 2.63 | 2.18-3.19 | 4.54 | 3.43-6.01 | p<0.001 |                                                     |
| Outside employment                      | 1                          | 1.5  | 1.36-1.67 | 1.61 | 1.43-1.81 | 2.09 | 1.86-2.35 | 3.42 | 2.99-3.90 | p<0.001 |                                                     |

Adjusted for socio-demographic variables.<sup>1</sup> Wald test for the interaction term between occupational class and length of sickness absence on disability retirement.
